# Supplementary material for: Hyperspectral Imaging Using a Convolutional Neural Network with Transformer for the Soluble Solid Content and pH Prediction of Cherry Tomatoes
Source: MDPI journal article supplement (doi:10.3390/foods13020251), 2024-01-12
Supplement: s1 [file s1]

# Hyperspectral Imaging Using a Convolutional Neural Network with Transformer for the Soluble Solid Content and pH Prediction of Cherry Tomatoes

Hengnian Qi <sup>1,†</sup>, Hongyang Li <sup>1,†</sup>, Liping Chen <sup>2,\*</sup>, Fengnong Chen <sup>3</sup>, Jiahao Luo <sup>1</sup> and Chu Zhang <sup>1,\*</sup>

<sup>1</sup> School of Information Engineering, Huzhou University, Huzhou 313000, China

<sup>2</sup> Huzhou Agricultural Science and Technology Development Center, Huzhou 313000, China

<sup>3</sup> School of Artificial Intelligence, Hangzhou Dianzi University, Hangzhou 310018, China

\* Correspondence: chenliping20042000@163.com (L.C.); chuzh@zjhu.edu.cn (C.Z.)

† These authors contributed equally to this work.

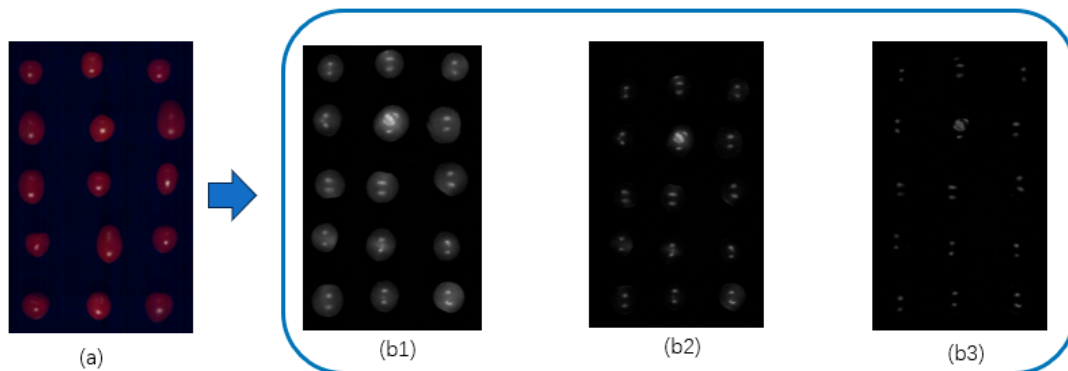

Figure S1. (a) RGB image of cherry tomato; (b1) Corrected grayscale image at 1008 nm; (b2) Corrected grayscale image at 1203 nm; (b3) Corrected grayscale image at 1403 nm
